# Supplementary material for: Flash-based Content Addressable Memory with L2 Distance for Memory-Augmented Neural Network
Source: Research Square preprint supplement (doi:10.21203/rs.3.rs-2328388/v1), 2022-12-01
Supplement: Supplementary file 1 [file 040ae9b1a731c12854b08001.pdf]

## Supplementary Information

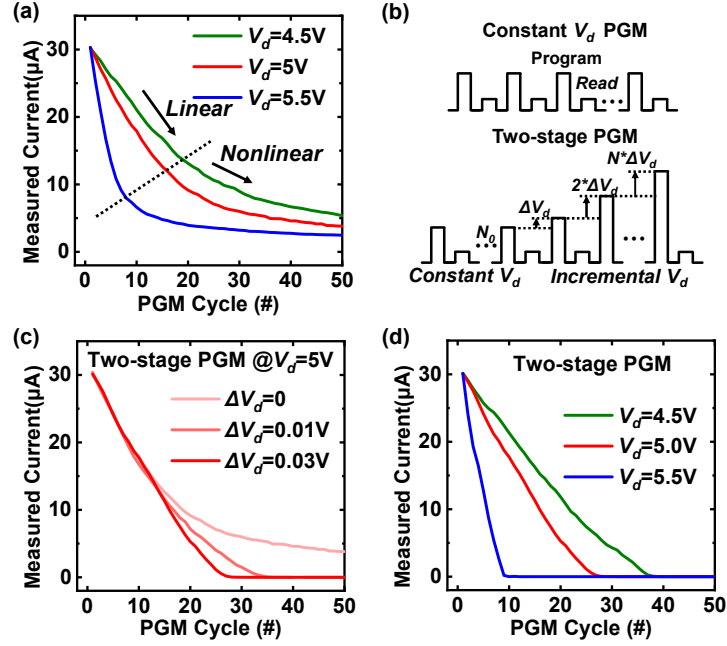

**Fig. S1: The proposed two-stage programming scheme.** (a) Programming curves (program@  $V_g=9\text{ V}$  and read@  $V_g=6\text{ V}$ ,  $V_d=0.8\text{ V}$ ). (b) The proposed two-stage programming scheme. (c) Programming curves with different  $V_d$  incremental steps. (d) Programming curves with excellent linearity by employing the two-stage programming scheme.

In the scenario of working as CAM, Flash states are represented by the read currents, rather than the threshold voltages as in memory mode. The applicable programming scheme should be also different, which demands a linear current modulation during programming. However, when programming under a fixed drain voltage ( $V_d$ ), the read currents will decrease linearly at first, and then more and more nonlinearly, as shown in **Fig. S1(a)**. This is because as the Flash programming goes on, the electrons trapped in the floating gate is accumulating to saturation, which reduces the programming efficiency [1].

To address this and improve linearity, we propose a two-stage programming scheme, which employs a constant  $V_d$  in the first  $N_0$  cycles, and then an increasing  $V_d$  with a  $\Delta V$  which is also incremental, as shown in **Fig. S1(b)**. The principle is utilizing the increasing  $V_d$  to compensate for the influence of electron saturation. The effects of different  $V_d$  incremental steps with initial  $V_d=5\text{ V}$  are shown in **Fig. S1(c)**. As the step increases, we can see that the programming linearity is recovered gradually. Besides, by selecting the step sizes carefully, we can obtain an excellent linearity for different initial  $V_d$ , as shown in **Fig. S1(d)**. Hence, we can obtain different programming speeds and current steps by selecting the different initial  $V_d$  and corresponding  $\Delta V$ .



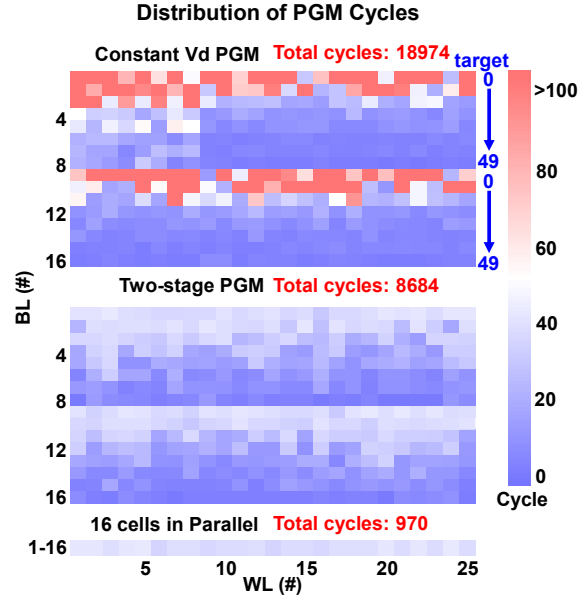

**Fig. S3: The comparison of programming cycles in three programming schemes.** PGM cycles are dramatically reduced by parallel scheme. The target conductance is set by the L2 distance in each column for fair comparison. (measured @400cells)

Fig. S3 shows the comparison of required programming cycles in three programming schemes, constant  $V_d$  programming, two-stage programming alone, parallel and two-stage programming together, respectively. Noted that the number of cycles required in parallel scheme depends on the smallest target currents in the group, therefore, for a fair comparison, the targets in each group are set to cover all the states of 3-bit L2 distance. We set the parallelism as 16 (BL number), and the target currents in each group are 0, 1, 4, 9, 16, 25, 36, 49, 0, 1, 4, 9, 16, 25, 36, 49. By jointly employing the parallel and two-stage programming schemes, we can get a 19.6-fold (average of 25 WLs) reduction in total programming cycles, which provides the basis for rapid and precise on-device lifelong learning.

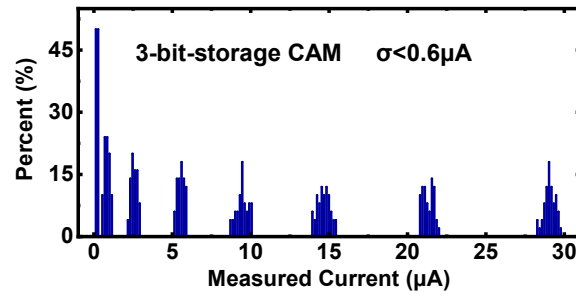

**Fig. S4: The overall current distribution of 3-bit-storage CAM.** This degree of current variation ( $\sigma < 0.6 \mu\text{A}$ ) is proved to have almost no degradation to accuracy ( $< 0.15\%$ ) in **Fig. 4(d)** of main text.

1  
2

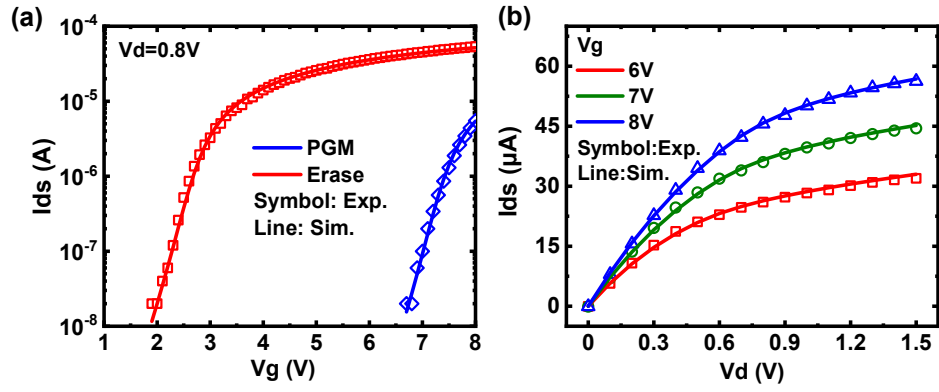

**Fig. S5: The fitted (a)  $I_d$ - $V_g$  and (b)  $I_d$ - $V_d$  curves of NOR Flash transistors based on BSIM3v3 model calibrated with experimental data. The model shows a good consistency with the experiments. The modified parameters include the thickness of oxide layer, saturation velocity of electron, carrier mobility, and source-drain series resistance.**

1

2

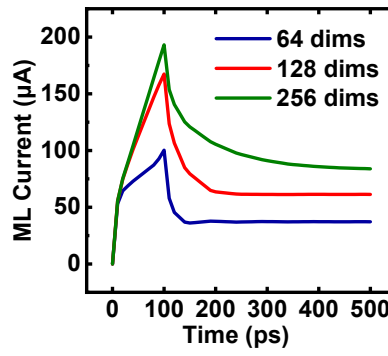

**Fig. S6: Search latency with different word widths in the proposed CAM design.**

The search latency will increase as the word width increases due to the increasing parasitic resistance and capacitance in MLs. We can see that the search latency in 256-dimension word is almost 500 ps, which increases by 3.3-times compared to 64-dimension word. Therefore, multi-bit capability in CAM is also crucial to reduce the word width (related to the circuit area and search energy) and search latency.

1

2

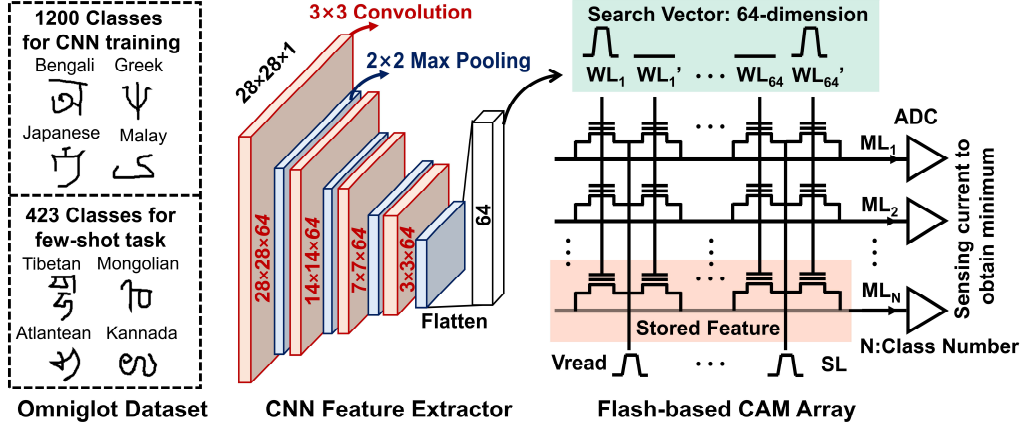

**Fig. S7: Experiments for few-shot learning.** Pre-trained 4-layer CNN is used to extract features. During few-shot learning, features of support set are written into the Flash-based CAM. During inference, search vector of query is compared with all the stored contents by calculating pair-wise L2 distance. Predicted label is given by sensing the minimum current of MLs.

The schematic of our experiments is shown in **Fig. S7**. we choose the widely used Omniglot dataset for demonstration. In this dataset, there are 1623 handwritten characters (classes) from different alphabets, and each character contains 20 examples from different people. We randomly choose 1200 classes for meta-training of feature extractor and the rest of 423 classes for configuring few-shot learning tasks. We employ a four-layer CNN as the feature extractor, which consists of 4 convolutional modules, each including 64-channel  $3 \times 3$  kernels, batch normalization, ReLU, and  $2 \times 2$  max-pooling. The output of final layer is flattened to a 64-dimension vector.

During meta-training, for one  $n$ -way  $k$ -shot task, we randomly sample  $n$  different classes (each class with  $k + x$  examples) from 1200 classes to establish support set ( $k$  examples) and query set ( $x$  examples). Here, both the support set and query set are labeled examples. The CNN is then trained to minimize the error of predicting labels in the query set by the back-propagation (BP) algorithm, which is called an “episode”. By repeating this process (randomly sampling few-shot tasks and BP training), the CNN is gradually meta-trained to be capable of employing a general scheme to map the input data to their appropriate labels regardless of their specific contents, namely learning to learn [2]. Note that the CNN weight parameters are fixed after meta-training and will no longer change during the following phase. During few-shot learning, the 64-dimension features of support set are first extracted by the CNN, quantized to 3-bit according to the scheme of L2 distance, and then stored in the Flash-based CAM. During inference, the extracted query features are coded and transformed into a series of WL voltages for computing L2 distance with all the stored features in parallel. The predicted label is given by sensing MLs for minimum current.

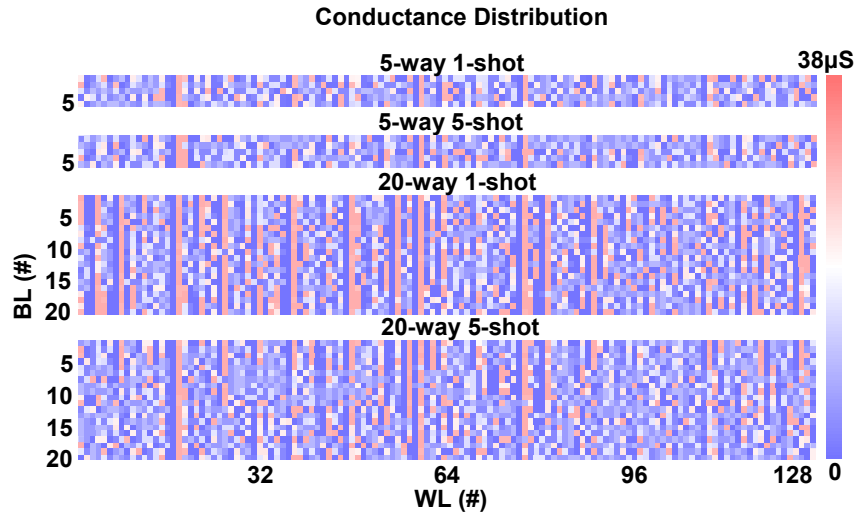

**Fig. S8: Conductance distribution of the stored 64-dimension feature vectors in different few-shot learning tasks.** The features of 5-shot task are average results across different shots.



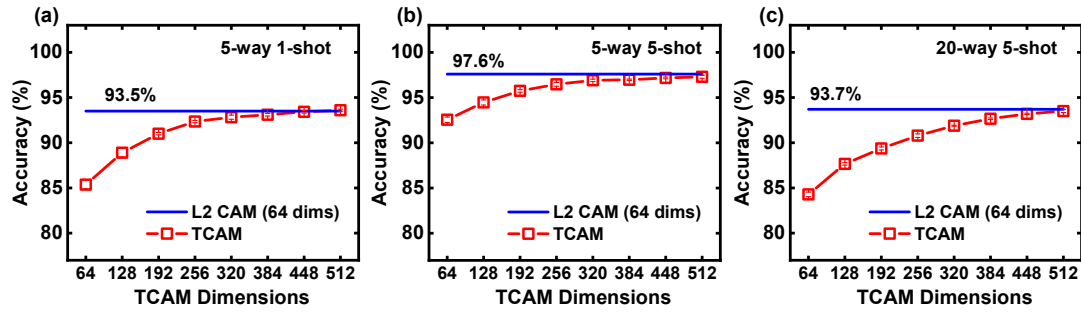

**Fig. S9:** To achieve the same accuracy with the proposed L2 CAM, the word width of TCAM needs to be extended.

1  
2  
3  
4

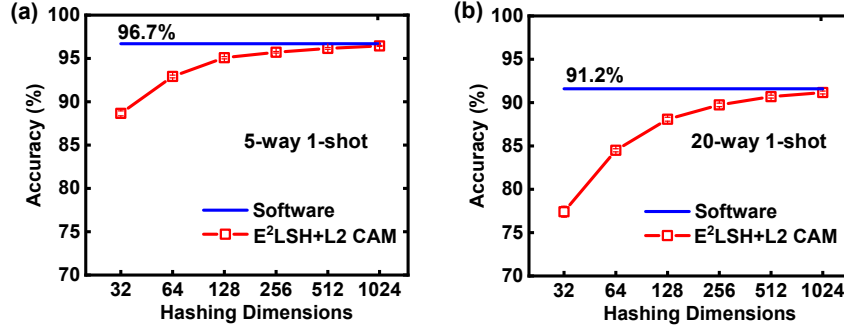

**Fig. S10: Increase L2 CAM dimensions by using p-stable locality sensitive hash algorithm (E<sup>2</sup>LSH) for higher inference accuracy.**

The LSH algorithm is to solve the problem of approximate nearest neighbor search. The original LSH method embeds the original feature-vector space into the Hamming space and converts the distance measure of original space to the Hamming distance, which performs bitwise XOR operation in two equal-length binary sequences and accumulates the results of “1” [3]. It has been applied in TCAM, but is difficult to directly extend to the multi-bit CAM.

To address this and apply the LSH method to our proposed multi-bit-storage L2 CAM, we employ the p-stable LSH method, which can directly perform the locality-sensitive hash operation in Euclidean space and is also called E<sup>2</sup>LSH [4]. The hashing function  $h_{a,b}(v)$  of p-stable LSH is defined in equation (1).

$$h_{a,b}(v) = \left\lfloor \frac{a \cdot v + b}{r} \right\rfloor \quad (1)$$

The parameter  $a$  is a random vector that has the same dimension as the feature vector  $v$ . Each element in  $a$  is randomly and independently generated from a p-stable distribution ( $p=2$  is Gaussian distribution). The parameter  $b$  is a random number in the range of  $[0, r]$ , of which  $r$  is an empirical hyperparameter. Besides, the final result needs a round-down operation. One hashing function acting on the original feature vector can generate one value for the new mapping vector. Therefore, by establishing more hashing functions, we can map the 64-dimension feature vector to a larger width and increase the inference accuracy of MANN. as shown in **Fig. S10**.

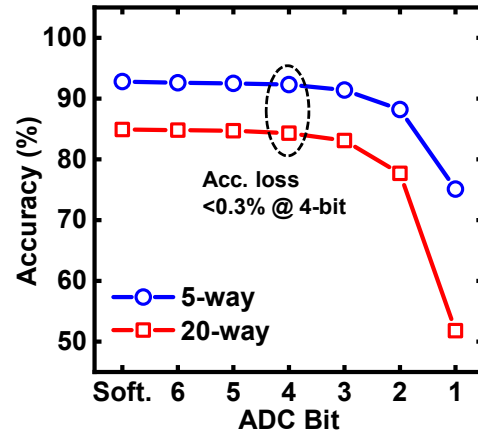

**Fig. S11: The impacts of ADC quantization precision on the inference accuracy.** 4-bit is enough for the quantization precision of ML sum current, with an accuracy loss less than 0.3% for both of 5-way and 20-way tasks.

1  
2  
3

## Supplementary References

1. Xiang, Y. C., Huang, P., Yang, H. Z., Wang, K. L., Han, R. Z., Shen, W. S., Kang, J. F., et al. (2019). Storage reliability of multi-bit flash oriented to deep neural network. In 2019 IEEE International Electron Devices Meeting (IEDM) (pp. 38-2). IEEE.
2. Santoro, A., Bartunov, S., Botvinick, M., Wierstra, D., and Lillicrap, T. (2016). Meta-learning with memory-augmented neural networks. In International conference on machine learning (pp. 1842-1850). PMLR.
3. Andoni, A., and Indyk, P. (2008). Near-optimal hashing algorithms for approximate nearest neighbor in high dimensions. *Communications of the ACM*, 51(1), 117-122.
4. Datar, M., Immorlica, N., Indyk, P., and Mirrokni, V. S. (2004). Locality-sensitive hashing scheme based on p-stable distributions. In Proceedings of the twentieth annual symposium on Computational geometry (pp. 253-262).
